# Supplementary material for: Electron Transfer Interactome of Cytochrome c
Source: PLOS journal article supplement (doi:10.1371/journal.pcbi.1002807), 2012-12-06
Supplement: S13 (10.1371/journal.pcbi.1002807.s013) [file journal.pcbi.1002807.s013]

The ET rates were calculated from Equation 8 in the main text using the  $\Delta G^\circ$  and  $\lambda$  values given below.

**Cc-CcP.** For the ET from yeast Cc to the CcP W191<sup>+</sup> radical, the driving force matches the reorganization energy ( $-\Delta G^\circ \approx \lambda$ ), so that the ET is described by the maximum, activationless rate constant  $k_{ET} \approx k_{ET,max}$  [S8]. For the ET to the CcP heme oxyferryl,  $\lambda = 0.7$  eV [S9] and  $\Delta G^\circ = -797$  mV can be calculated from the reduction potentials ( $\Delta E$ ) of yeast Cc,  $\Delta E = 290$  mV [S10], and the CcP oxyferryl,  $\Delta E = 1087$  mV [S11].

**Cc-Cb<sub>5</sub>.** For the heme-heme ET between bovine Cb<sub>5</sub> and yeast Cc,  $\lambda = 0.7$  eV [S12] and  $\Delta G^\circ = -270$  mV is calculated from  $\Delta E = 20$  mV for Cb<sub>5</sub> [S13] and  $\Delta E = 290$  mV for Cc [S10].

**Cc-Cbc<sub>1</sub>.** The reduction potentials of yeast Cc and Cc<sub>1</sub> hemes are nearly identical (i.e.  $\Delta G^\circ \approx 0$ ) [S2], while the reorganization energy is estimated to be in the range  $\lambda = 0.7 - 1$  eV [S2].

**Cc-CCO.** With  $\Delta E = 245$  mV for the CuA site [S14] and  $\Delta E = 220$  mV for the horse Cc bound to CCO [S15],  $\Delta G^\circ = -25$  mV. The reorganization energy for the intermolecular ET step,  $\lambda$ , can be calculated from the reorganization energies of Cc,  $\lambda_1 \approx 0.7$  eV [S16], and the CuA site,  $\lambda_2 \approx 0.4$  eV [S17], as  $\lambda = (\lambda_1 + \lambda_2)/2 = 0.55$  eV.

**Cc-Fcb<sub>2</sub>.** With  $\Delta E = 6$  mV for the heme b<sub>5</sub> of Fcb<sub>2</sub> [S18] and  $\Delta E = 290$  mV for the yeast Cc [S10],  $\Delta G^\circ = -284$  mV;  $\lambda = 0.7$  eV as reported for the Cc-Cb<sub>5</sub> couple [S12].

**Cc-SOX.** With  $\Delta E = 20$  mV for the heme group in Cb<sub>5</sub> [S13] and  $\Delta E = 260$  mV for the horse Cc [S19],  $\Delta G^\circ = -240$  mV;  $\lambda = 0.7$  eV [S12].

**Cc-Erv1.** Given the values of  $\Delta E = 290$  mV for the yeast Cc [S10],  $\Delta E = 215$  mV for the Erv1 flavin [S20], and  $\Delta E = 150$  mV for the C130-C133 disulfide in Erv1 [S20], the activation energy for the ET from the Erv1 flavin or C130-C133 disulfide is  $\Delta G^\circ = -75$  mV or  $-140$  mV, respectively. A range of reorganization energies ( $\lambda = 0.7 - 1$  eV) was used in the calculations.
